# Supplementary material for: Chiroptical Sensing of Amino Acid Derivatives by Host–Guest Complexation with Cyclo[6]aramide
Source: Molecules. 2021 Jul 2;26(13):4064. doi: 10.3390/molecules26134064 (PMC8271771; doi:10.3390/molecules26134064)
Supplement: Supplementary file 1 [file molecules-26-04064-s001.zip › molecules-1247034-supplementary.pdf]

## Supporting Information

### Chiroptical Sensing of Amino Acid Derivatives by Host-Guest Complexation with Cyclo[6]aramide

Xuebin Wang, Jiecheng Ji, Zejiang Liu, Yimin Cai, Jialiang Tang, Yunzhi Shi, Cheng Yang\*  
and Lihua Yuan\*

*College of Chemistry, Key Laboratory of Radiation Physics and Technology of Ministry of Education, Sichuan University, Chengdu 610064, China; 2017222030073@stu.scu.edu.cn (X.W.); jijiecheng\_scu@163.com (J.J.); supramolecularsaf@163.com (Z.L.); ymcai20202020@163.com (Y.C.); 2017141231117@stu.scu.edu.cn (J.T.); 2018141231158@stu.scu.edu.cn (Y.S.)*

\* Correspondence: yangchengyc@scu.edu.cn (C.Y.); lhyuan@scu.edu.cn (L.Y.)

#### Table of Contents

|                                                                                                                        |    |
|------------------------------------------------------------------------------------------------------------------------|----|
| 1. Synthetic route of novel compounds.....                                                                             | 1  |
| 2. <sup>1</sup> H NMR and <sup>13</sup> C{ <sup>1</sup> H} NMR spectra of novel compounds.....                         | 2  |
| 3. ESI-HRMS spectrum of novel compounds.....                                                                           | 7  |
| 4. Chemical structures of <b>L4-L12</b> .....                                                                          | 8  |
| 5. Stacked CD spectra between <b>1a</b> and <b>L1-L12</b> .....                                                        | 9  |
| 6. Stacked <sup>1</sup> H NMR spectra of <b>1a</b> and <b>L2-L3</b> .....                                              | 10 |
| 7. 2D NOESY spectra .....                                                                                              | 11 |
| 8. Binding ratios determination between <b>1a</b> and <b>L1-L3</b> .....                                               | 15 |
| 8.1 Job Plot experiments .....                                                                                         | 15 |
| 8.2 MALDI-TOF-MS experiments .....                                                                                     | 18 |
| 9. Binding constants determination between <b>1a</b> and <b>L1-L3</b> .....                                            | 19 |
| 10. Symmetrical CD spectral profiles of <b>1a</b> , <b>1a</b> and L/D-amino acid esters and L/D-amino acid esters..... | 22 |
| 11. DFT simulations.....                                                                                               | 24 |

## 1. Synthetic route of novel compounds

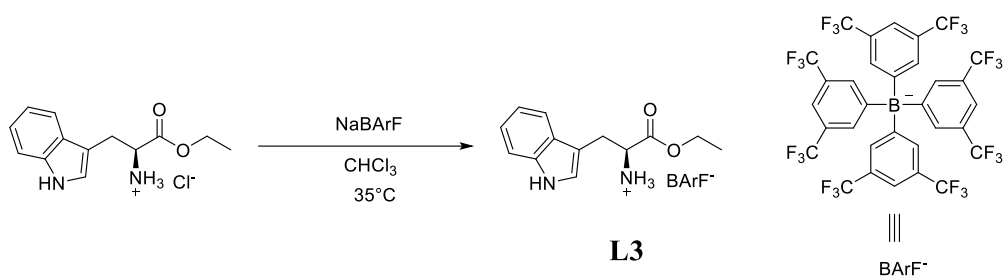

**Scheme S1.** Synthetic route for compound **L3**.

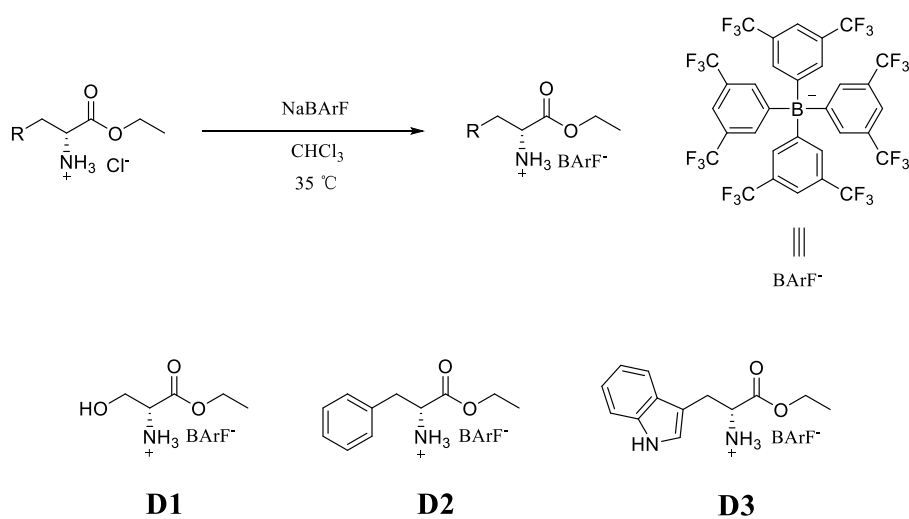

**Scheme S2.** Synthetic route for compounds **D1**, **D2** and **D3**.

## 2. $^1\text{H}$ NMR and $^{13}\text{C}\{^1\text{H}\}$ NMR spectra of novel compounds

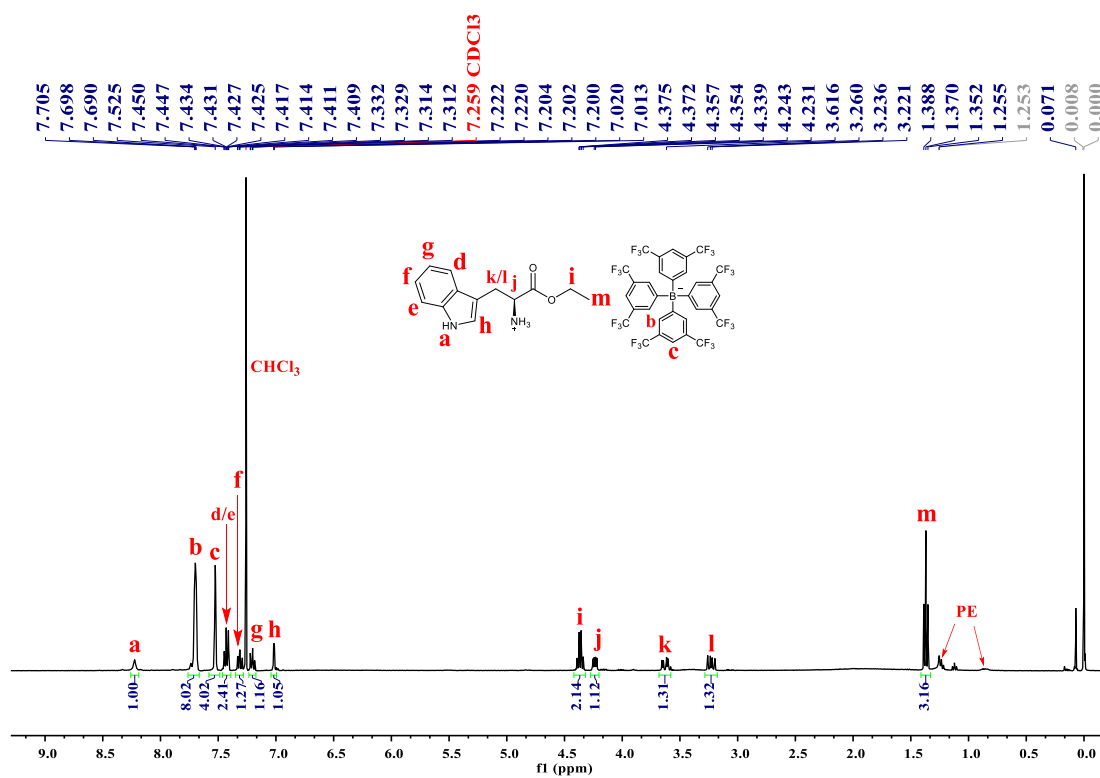

Figure S1.  $^1\text{H}$  NMR spectrum of compound L3 (400 MHz,  $\text{CDCl}_3$ , 298 K).

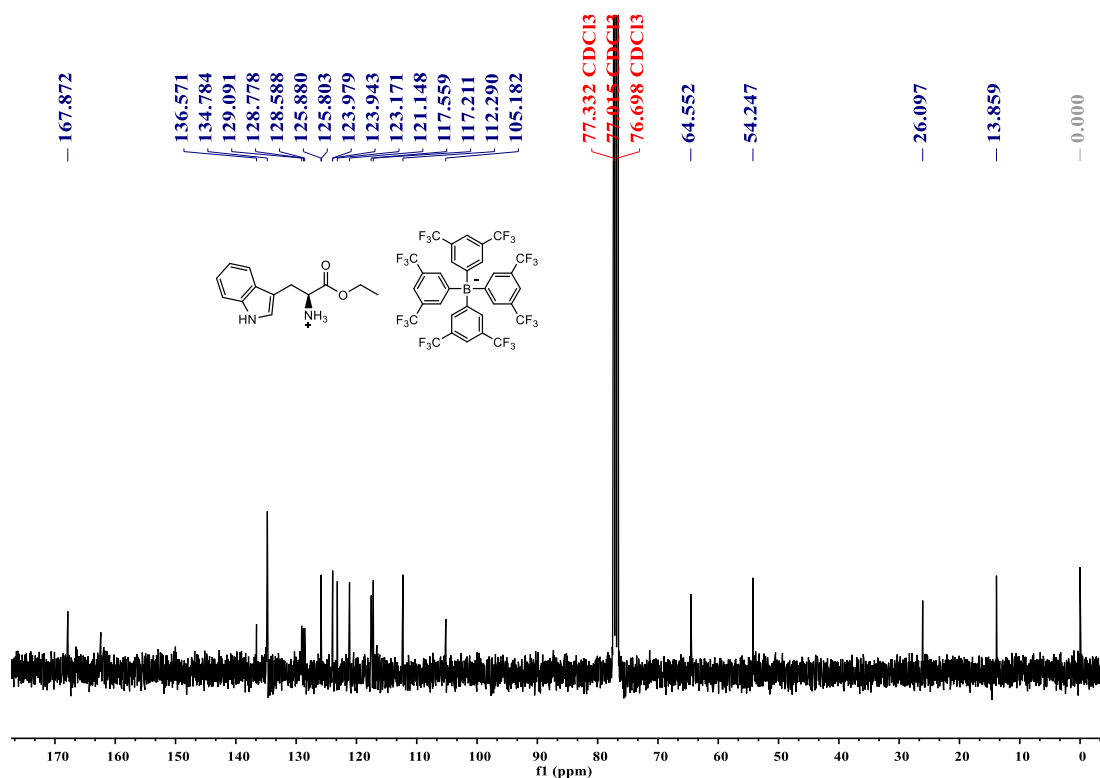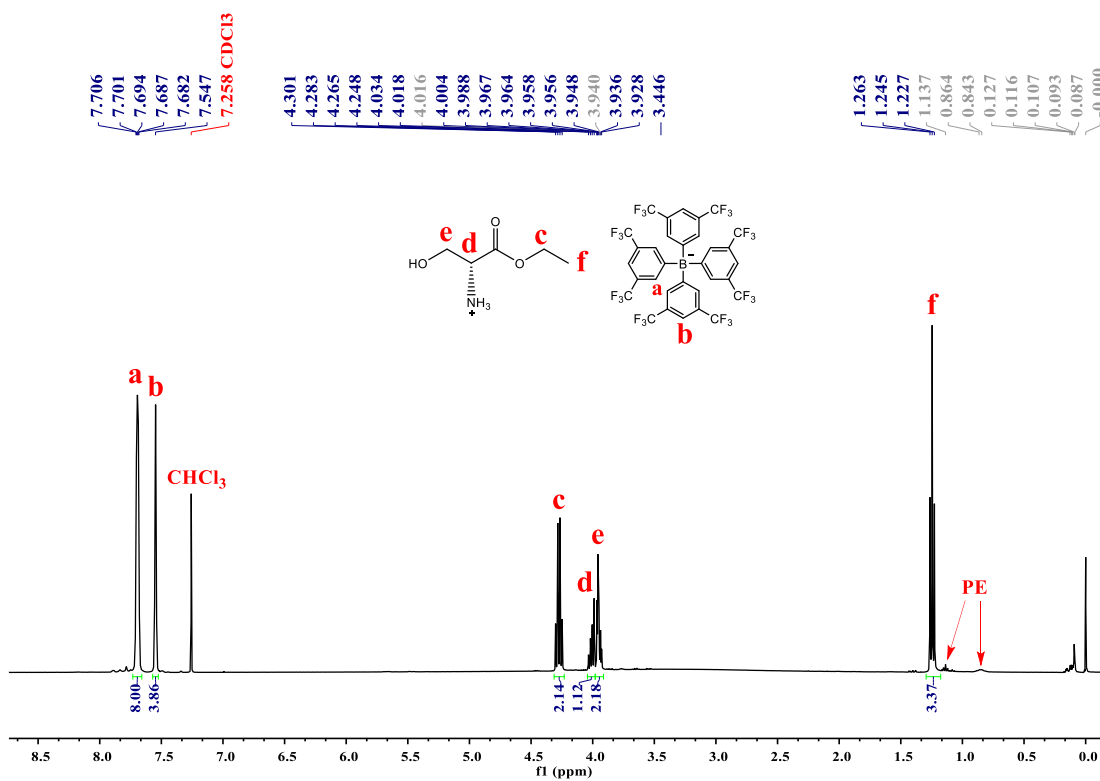

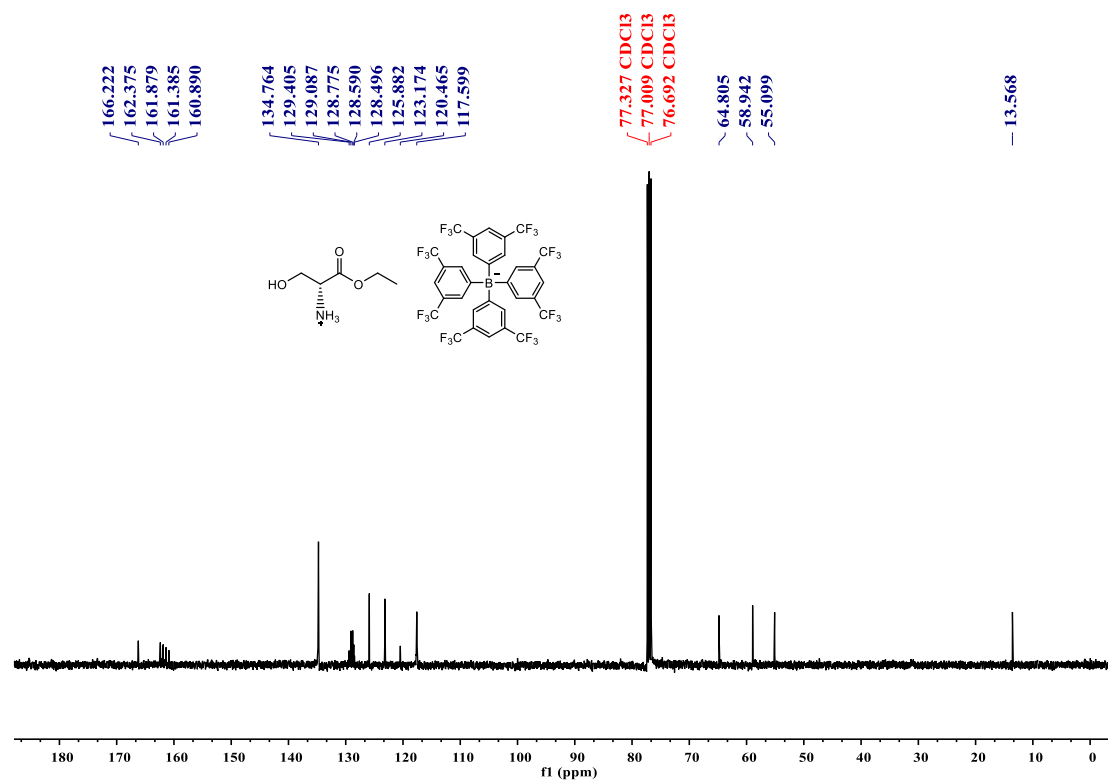

**Figure S4.**  $^{13}\text{C}\{^1\text{H}\}$  NMR spectrum of compound **D1** (101 MHz,  $\text{CDCl}_3$ , 298 K).

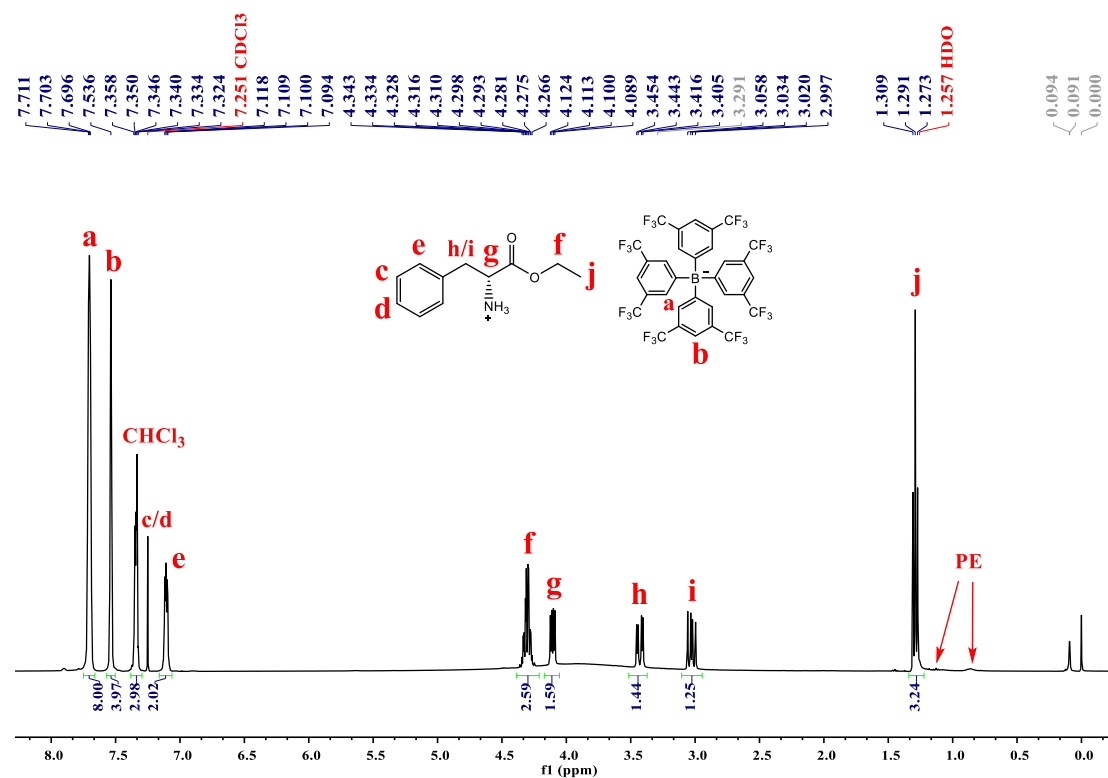

**Figure S5.**  $^1\text{H}$  NMR spectrum of compound **D2** (400 MHz,  $\text{CDCl}_3$ , 298 K).

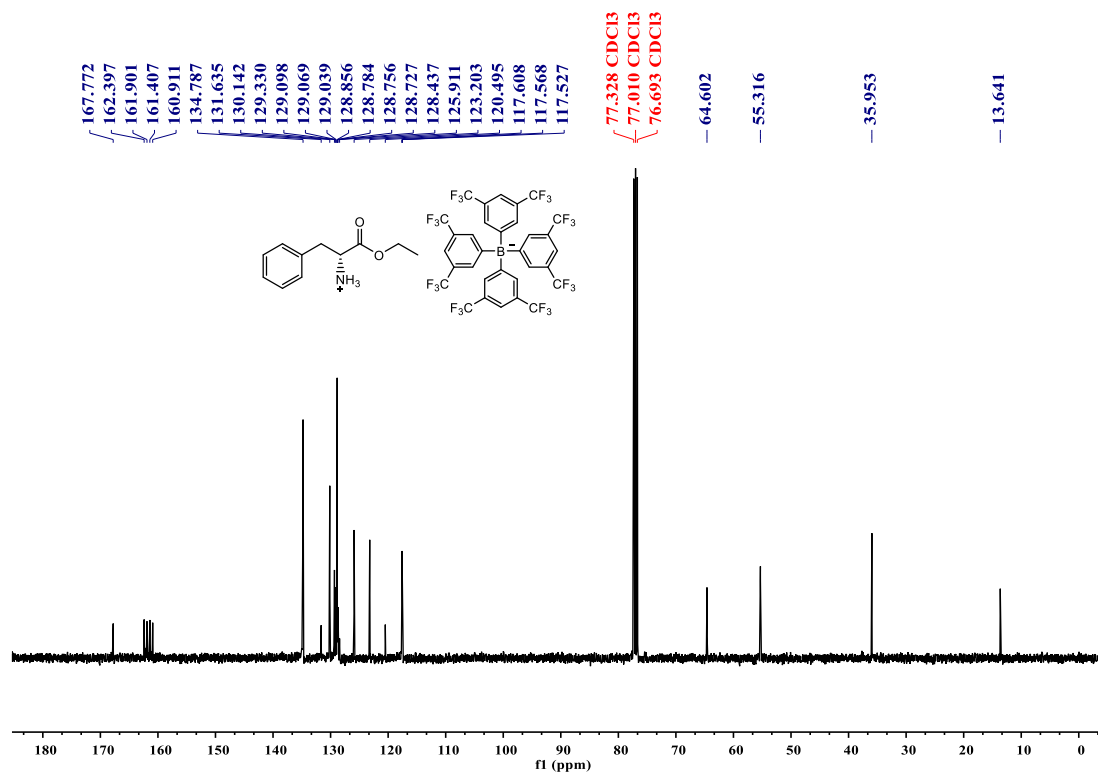

**Figure S6.**  $^{13}\text{C}\{^1\text{H}\}$  NMR spectrum of compound **D2** (101 MHz,  $\text{CDCl}_3$ , 298 K).

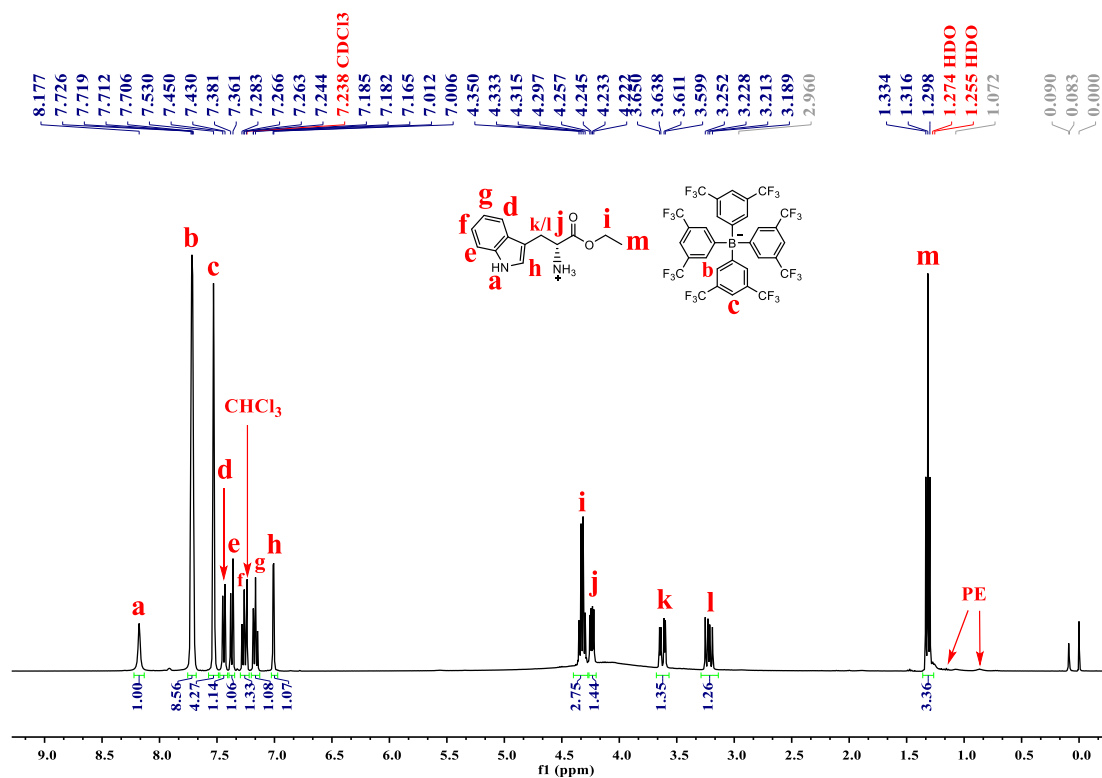

**Figure S7.** <sup>1</sup>H NMR spectrum of compound **D3** (400 MHz, CDCl<sub>3</sub>, 298 K).

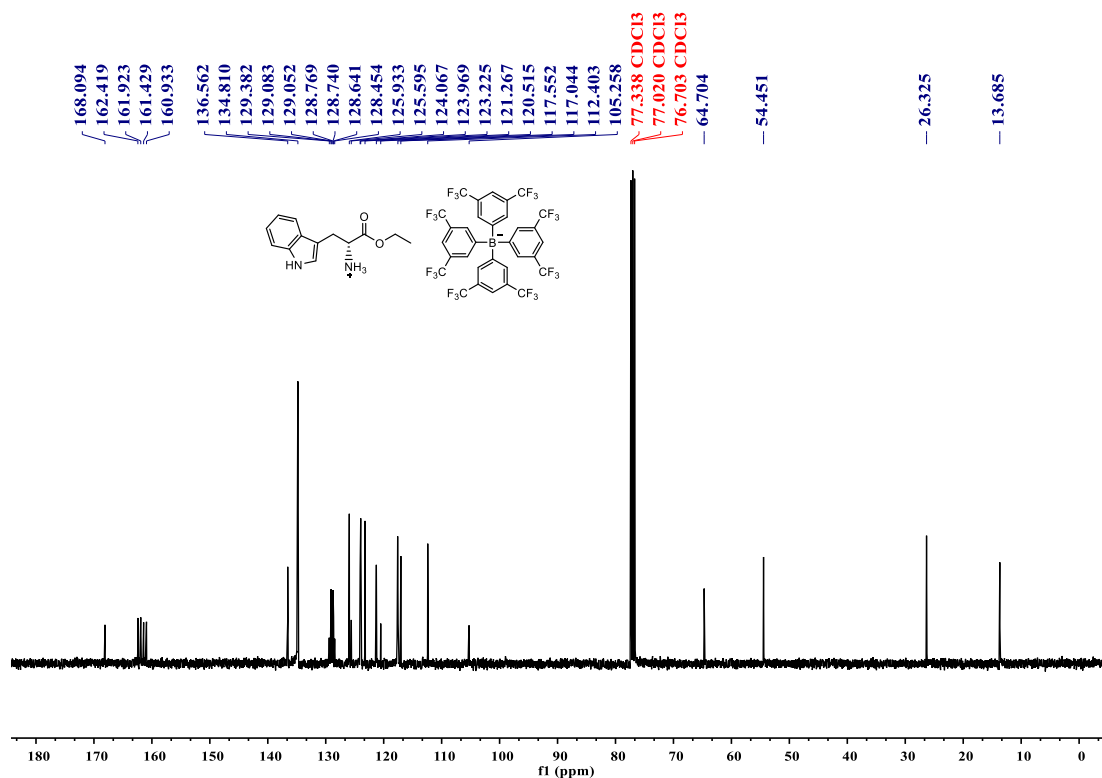

**Figure S8.** <sup>13</sup>C{<sup>1</sup>H} NMR spectrum of compound **D3** (101 MHz, CDCl<sub>3</sub>, 298 K).

### 3. ESI-HRMS spectrum of novel compounds

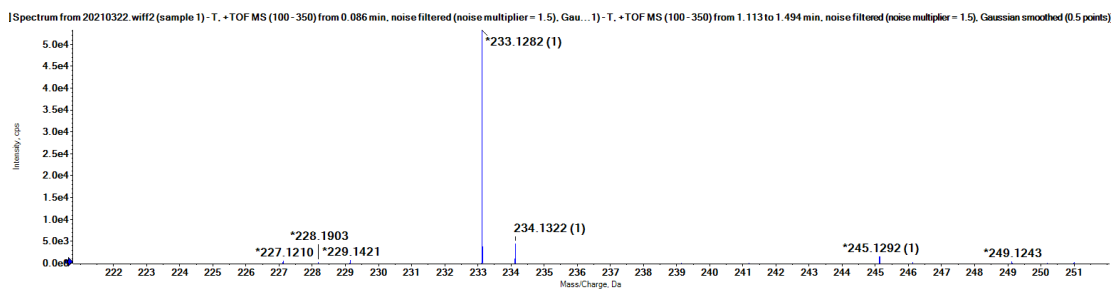

**Figure S9.** ESI-HRMS spectrum of compound **L3**.

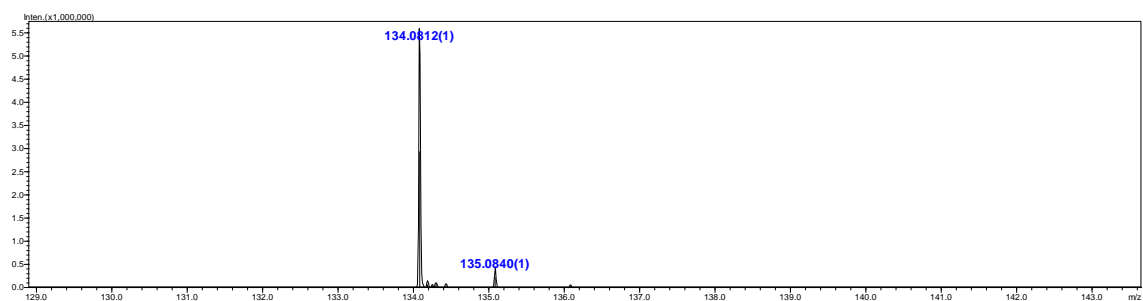

**Figure S10.** ESI-HRMS spectrum of compound **D1**.

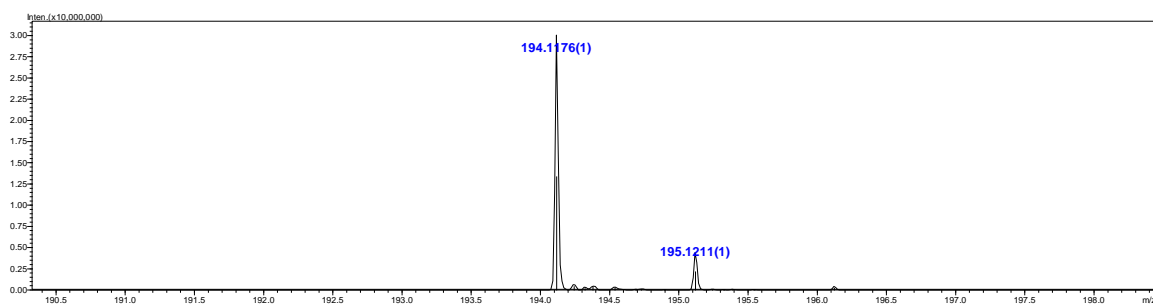

**Figure S11.** ESI-HRMS spectrum of compound **D2**.

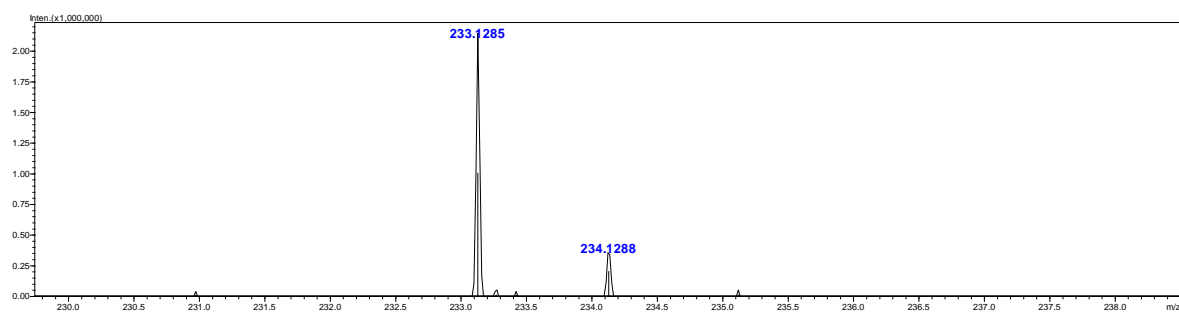

**Figure S12.** ESI-HRMS spectrum of compound **D3**.

#### 4. Chemical structures of L4-L12

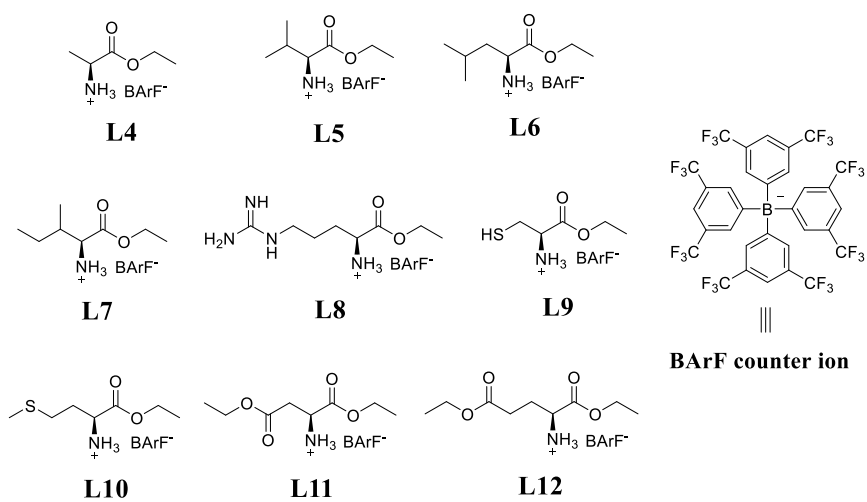

**Scheme S3.** Chemical structures of compounds **L4-L12**.

## 5. Stacked CD spectra between **1a** and **L1-L12**

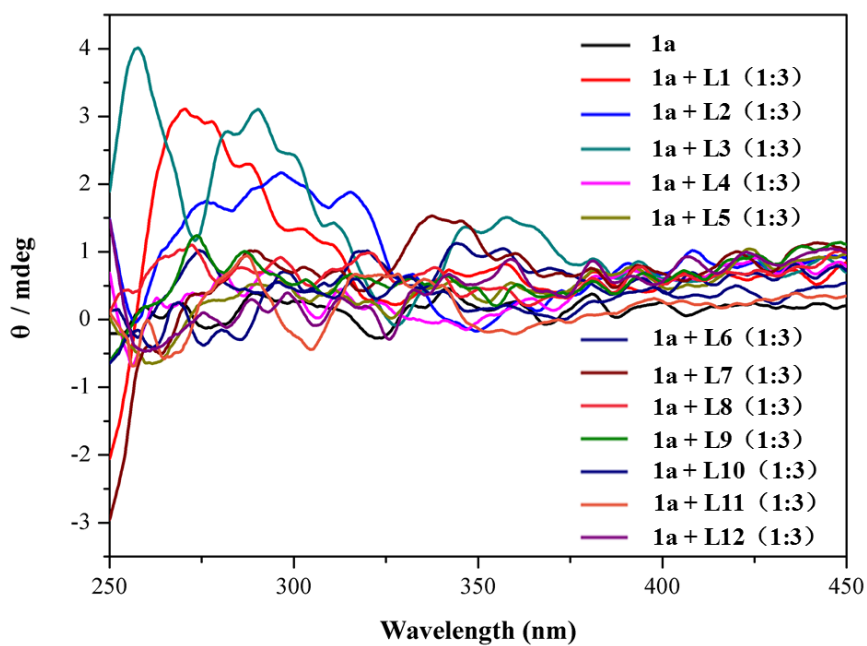

**Figure S13.** Stacked CD spectra of cyclo[6]aramide **1a** (25  $\mu\text{M}$ ) and chiral guests **L1-L12** (74  $\mu\text{M}$ ) in the presence of host **1a** (25  $\mu\text{M}$ ) measured in HPLC chloroform at 298 K respectively (optical path of cell: 10 mm).

## 6. Stacked $^1\text{H}$ NMR spectra of 1a-L2-L3

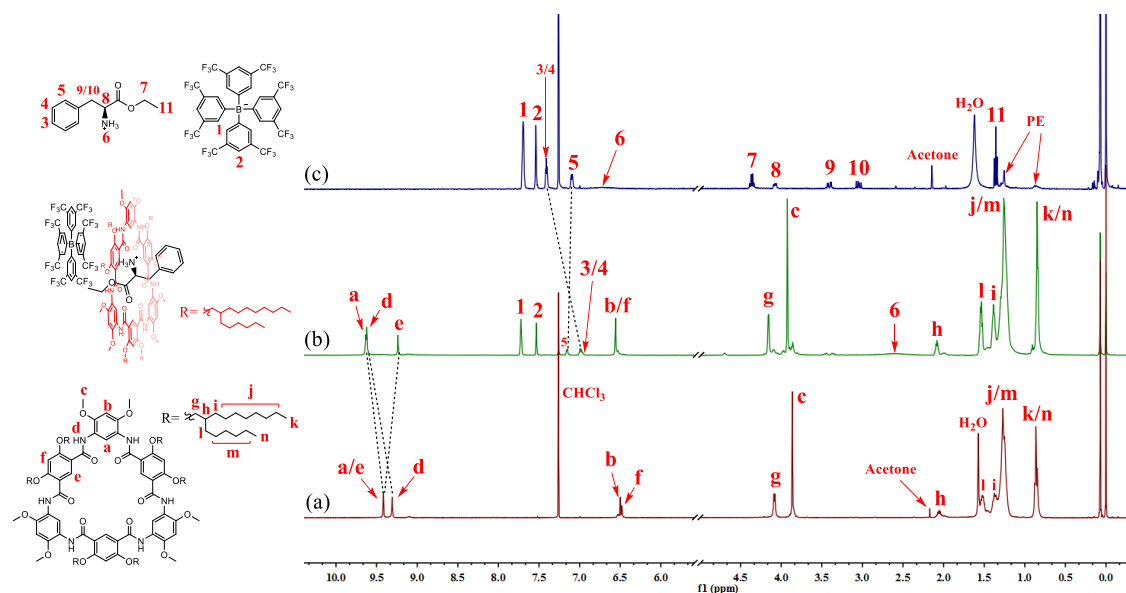

**Figure S14.** Stacked  $^1\text{H}$  NMR spectra (400 MHz,  $\text{CDCl}_3$ , 298 K) of (a) 2 mM 1a, (b) 2 mM 1a and 2 mM L2, (c) 2 mM L2.

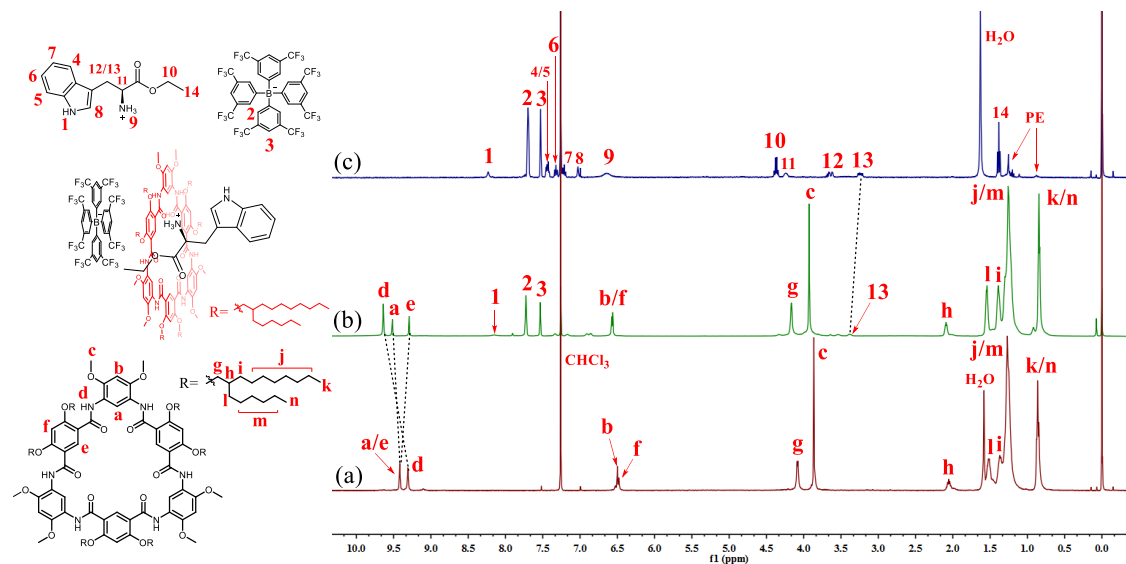

**Figure S15.** Stacked  $^1\text{H}$  NMR spectra (400 MHz,  $\text{CDCl}_3$ , 298 K) of (a) 2 mM 1a, (b) 2 mM 1a and 2 mM L3, (c) 2 mM L3.

## 7. 2D NOESY spectra

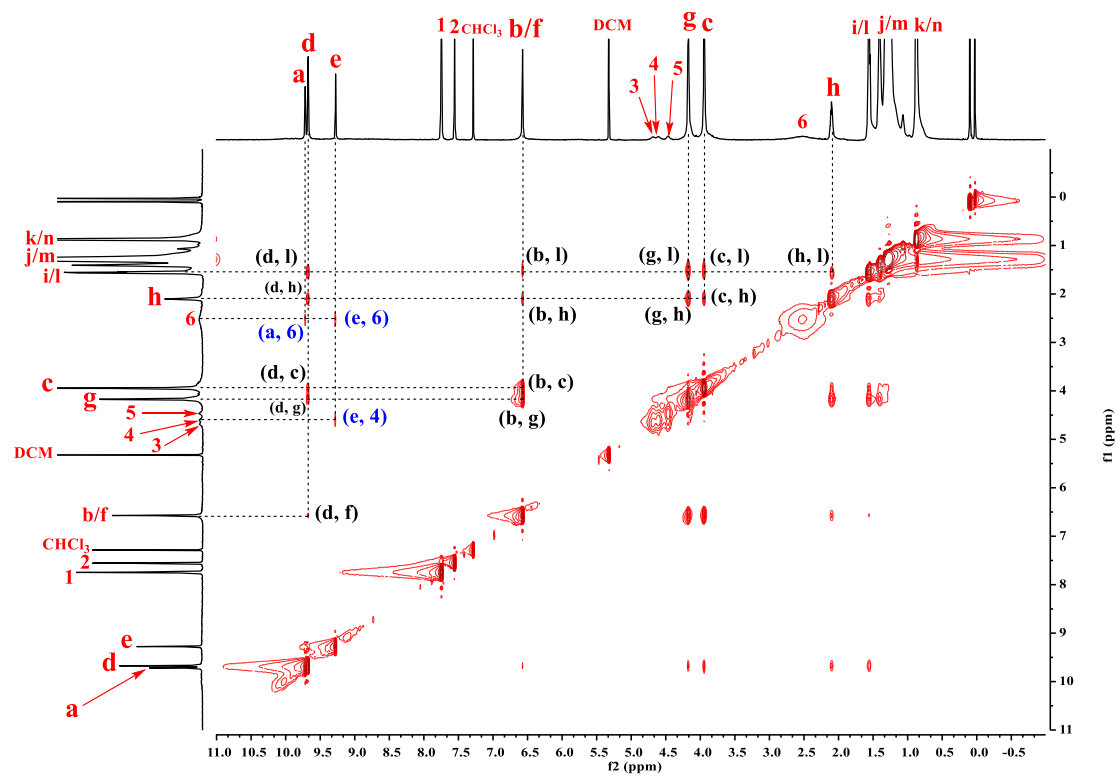

**Figure S16.** 2D NOESY spectrum of a mixture of 10 mM **1a** and 10 mM **L1** (600 MHz, CDCl<sub>3</sub>, 298 K, mixing time = 0.4 s).

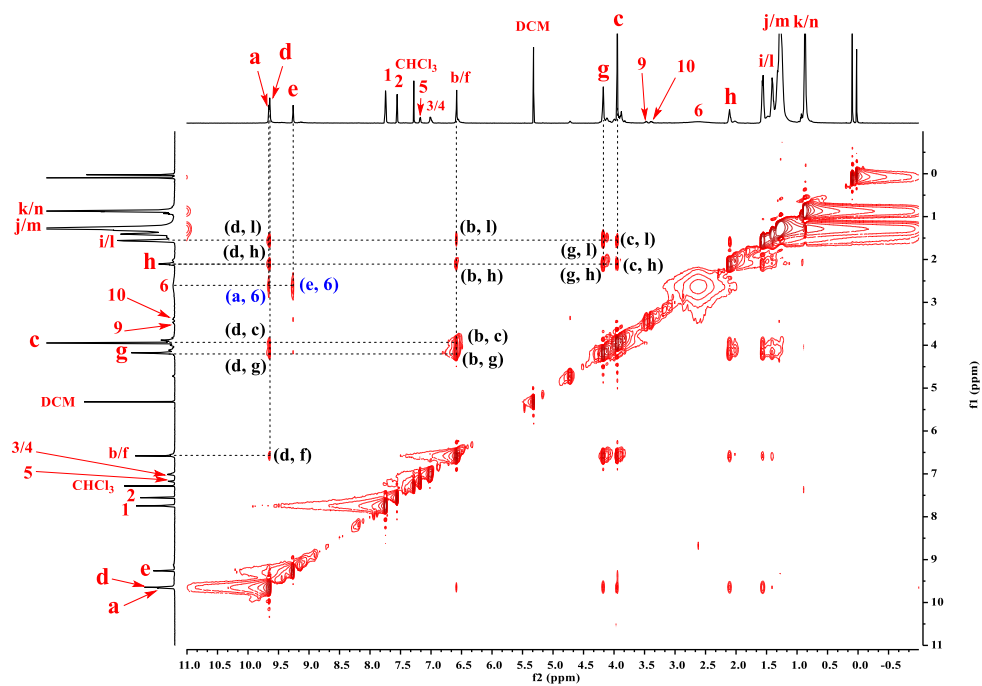

**Figure S17.** 2D NOESY spectrum of a mixture of 10 mM **1a** and 10 mM **L2** (600 MHz, CDCl<sub>3</sub>, 298 K, mixing time = 0.4 s).

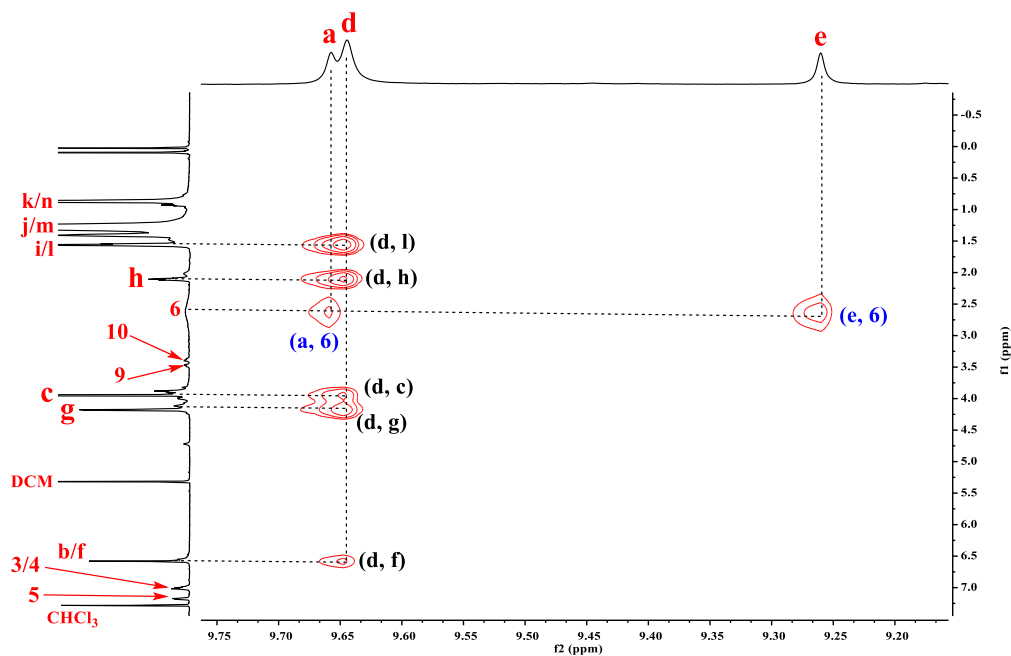

**Figure S18.** Partial 2D NOESY spectrum of a mixture of 10 mM **1a** and 10 mM **L2** (600 MHz, CDCl<sub>3</sub>, 298 K, mixing time = 0.4 s).

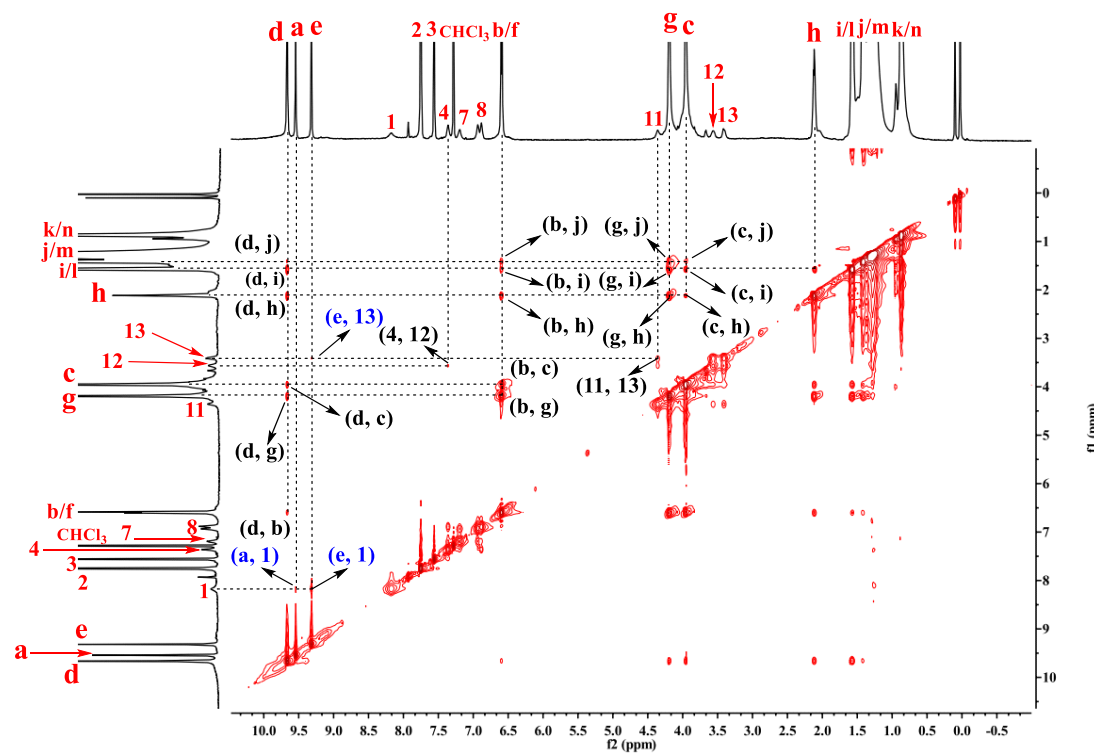

**Figure S19.** 2D NOESY spectrum of a mixture of 10 mM **1a** and 10 mM **L3** (600 MHz,  $\text{CDCl}_3$ , 298 K, mixing time = 0.4 s).

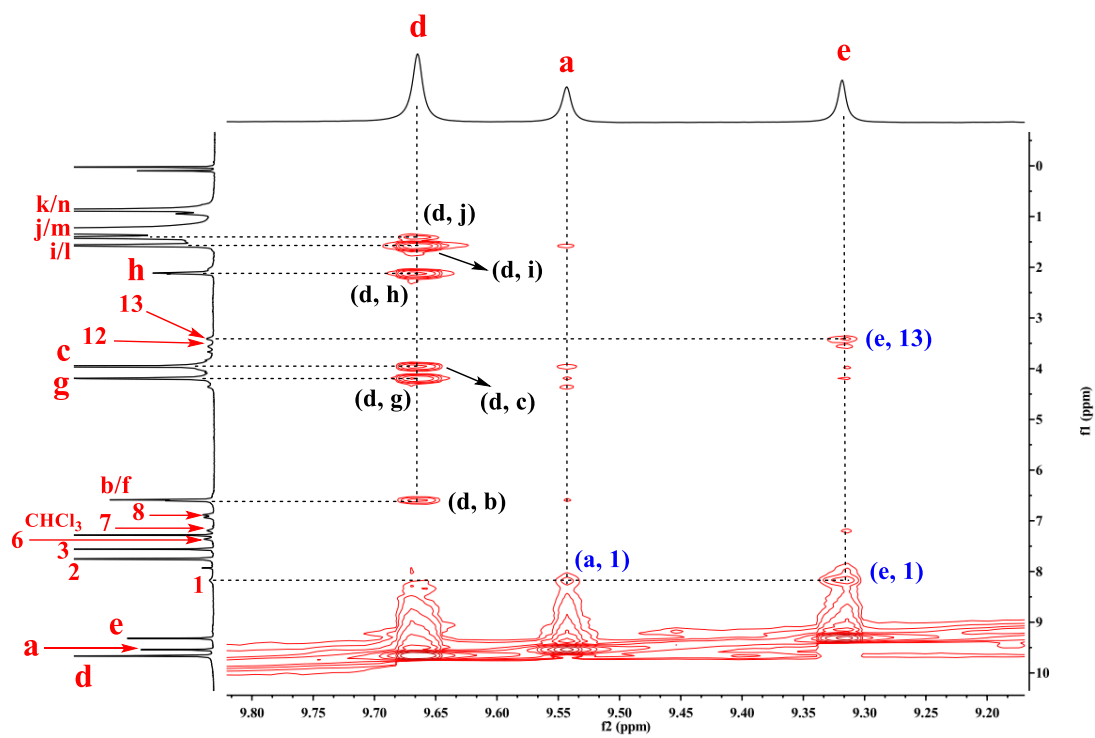

**Figure S20.** Partial 2D NOESY spectrum of a mixture of 10 mM **1a** and 10 mM **L3** (600 MHz,  $\text{CDCl}_3$ , 298 K, mixing time = 0.4 s).

## 8. Binding ratios determination between **1a** and **L1-L3**

### 8.1 Job Plot experiments

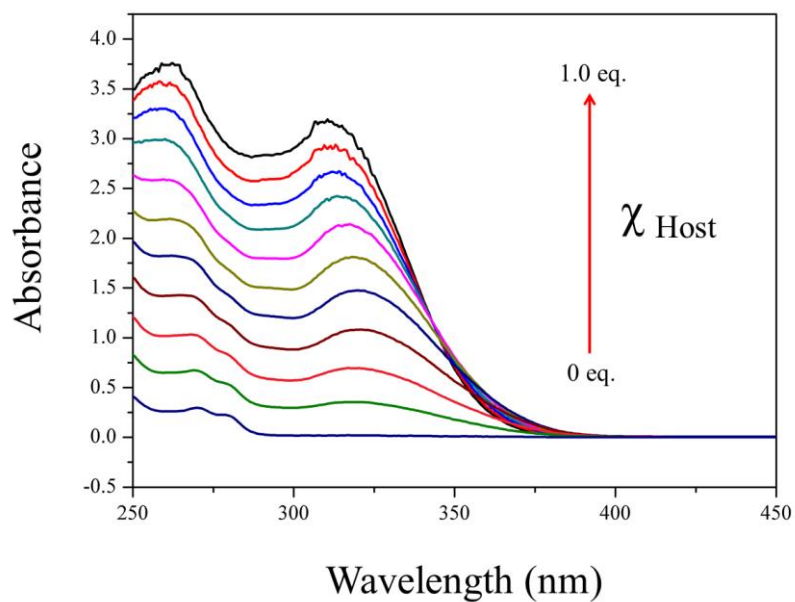

**Figure S21.** Stacked UV-vis spectra of Job plot experiment between **1a** and **L1** in HPLC chloroform. The total concentration is 50  $\mu\text{M}$ .

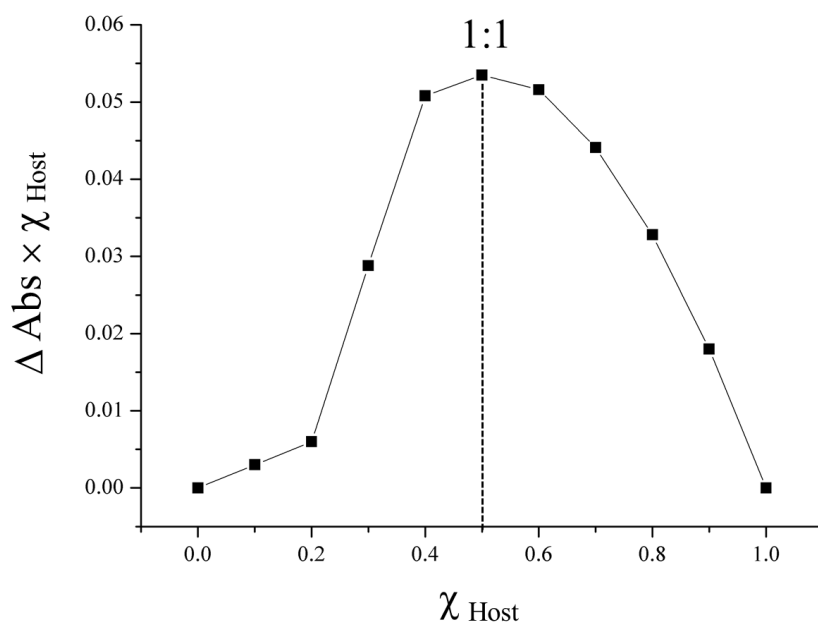

**Figure S22.** Job plot for the complexation of **1a** and **L1** based on the absorbance at 370 nm of UV-vis spectra.

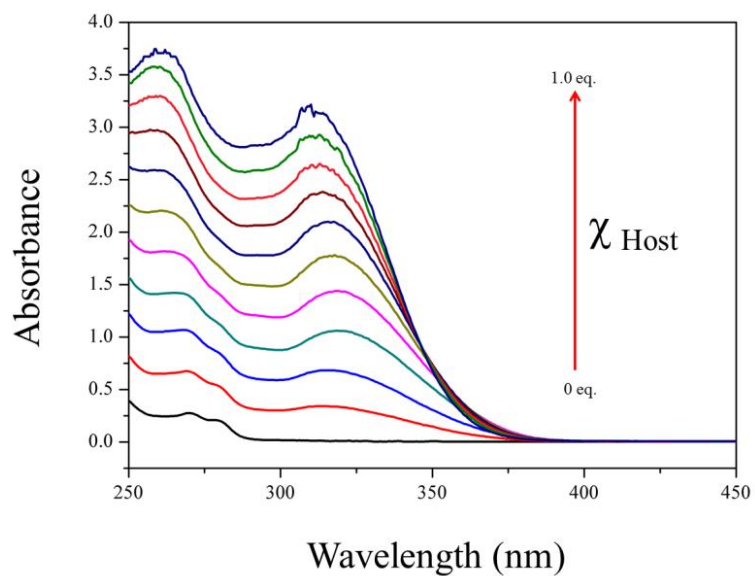

**Figure S23.** Stacked UV-vis spectra of Job plot experiment between **1a** and **L2** in HPLC chloroform. The total concentration is 50  $\mu\text{M}$ .

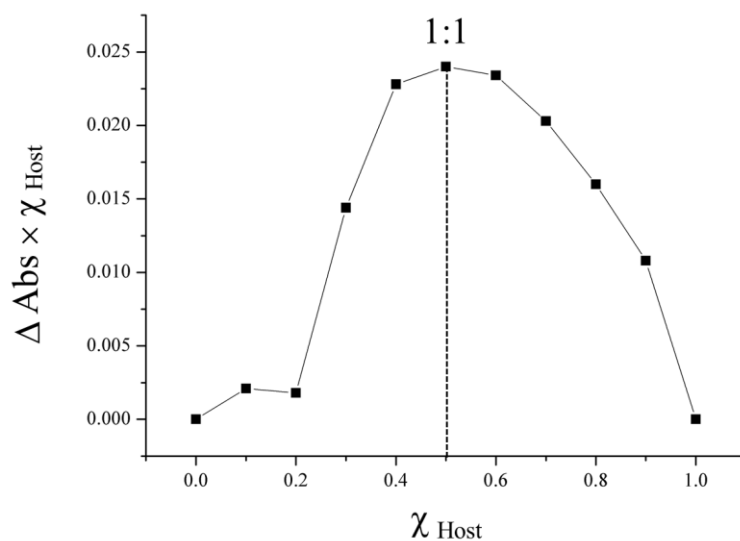

**Figure S24.** Job plot for the complexation of **1a** and **L2** based on the absorbance at 375 nm of UV-vis spectra.

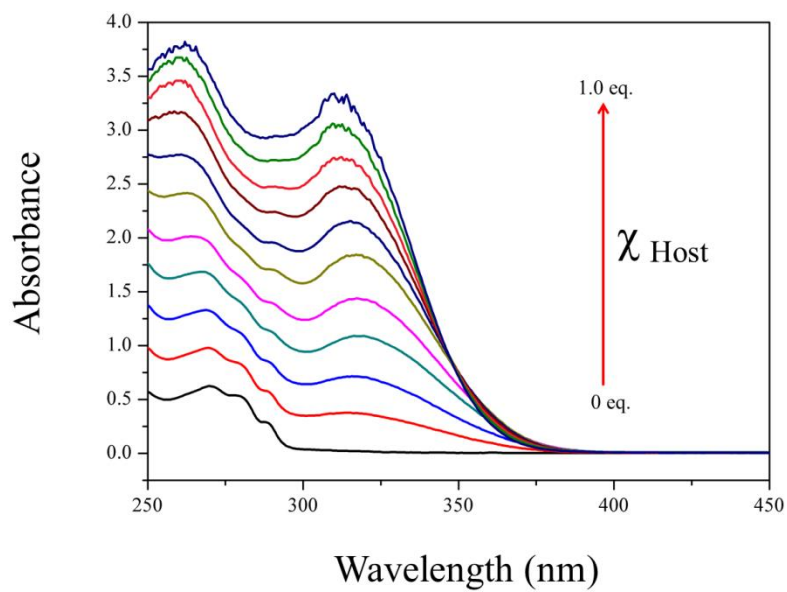

**Figure S25.** Stacked UV-vis spectra of Job plot experiment between **1a** and **L3** in HPLC chloroform. The total concentration is 50  $\mu\text{M}$ .

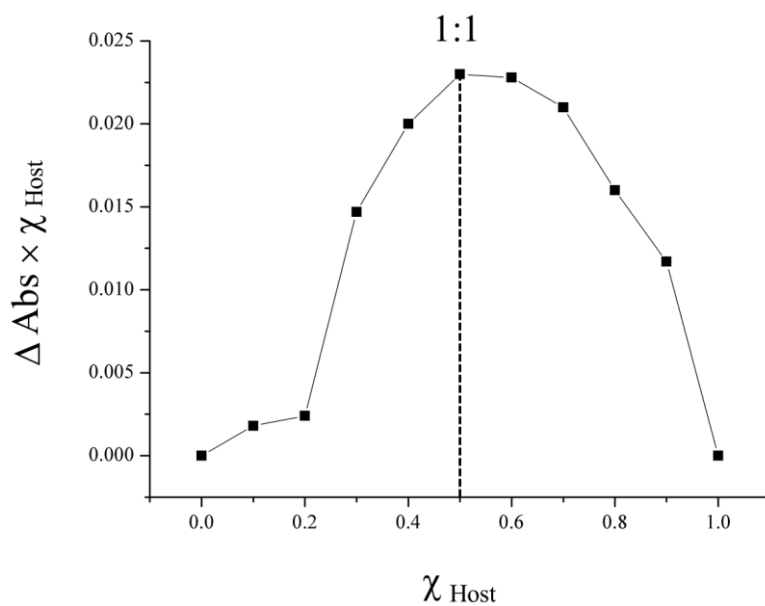

**Figure S26.** Job plot for the complexation of **1a** and **L3** based on the absorbance at 375 nm of UV-vis spectra.

## 8.2 MALDI-TOF-MS experiments

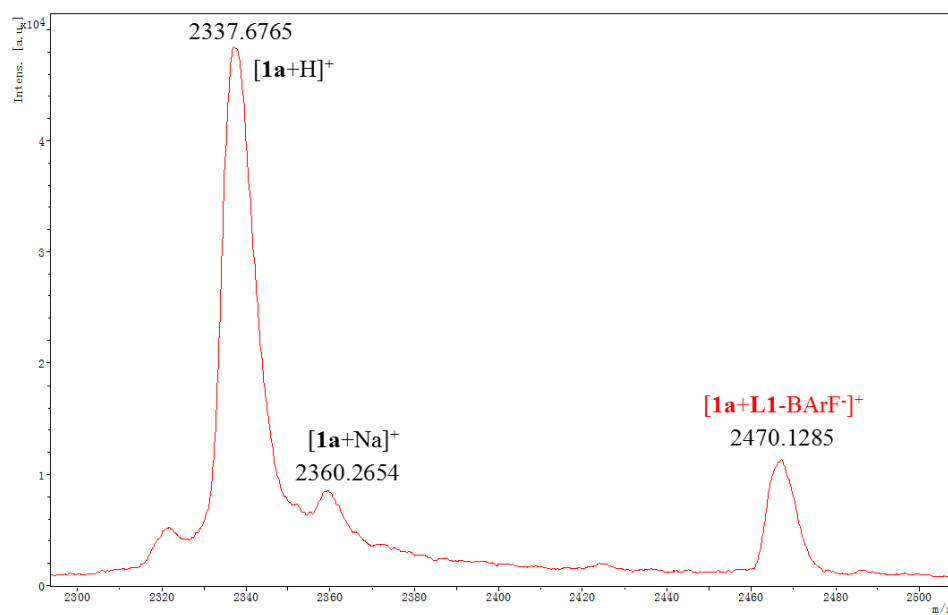

**Figure S27.** Partial MALDI-TOF-MS spectrum of complex **1a** with **L1**.

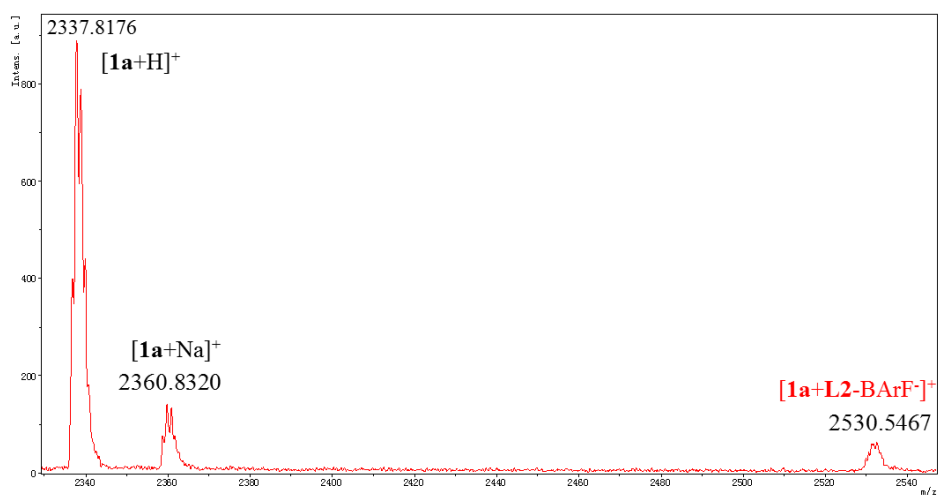

**Figure S28.** Partial MALDI-TOF-MS spectrum of complex **1a** with **L2**.

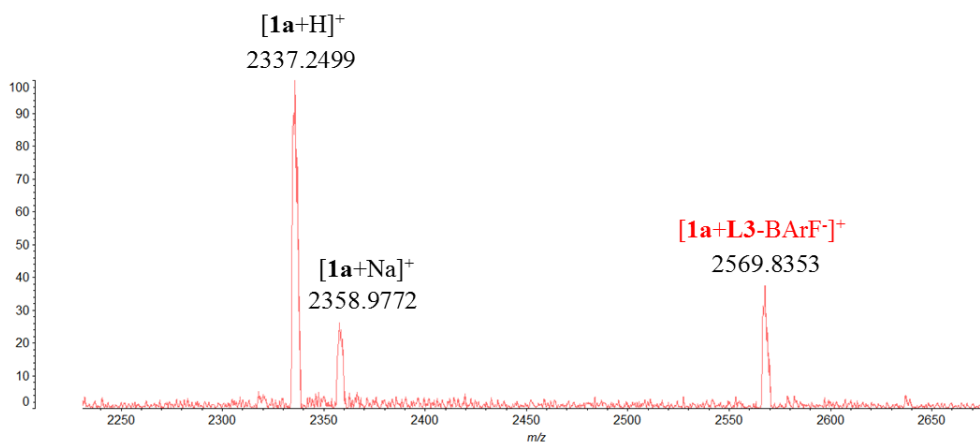

**Figure S29.** Partial MALDI-TOF-MS spectrum of complex **1a**+**L3**.

## 9. Binding constants determination between **1a** and **L1-L3**

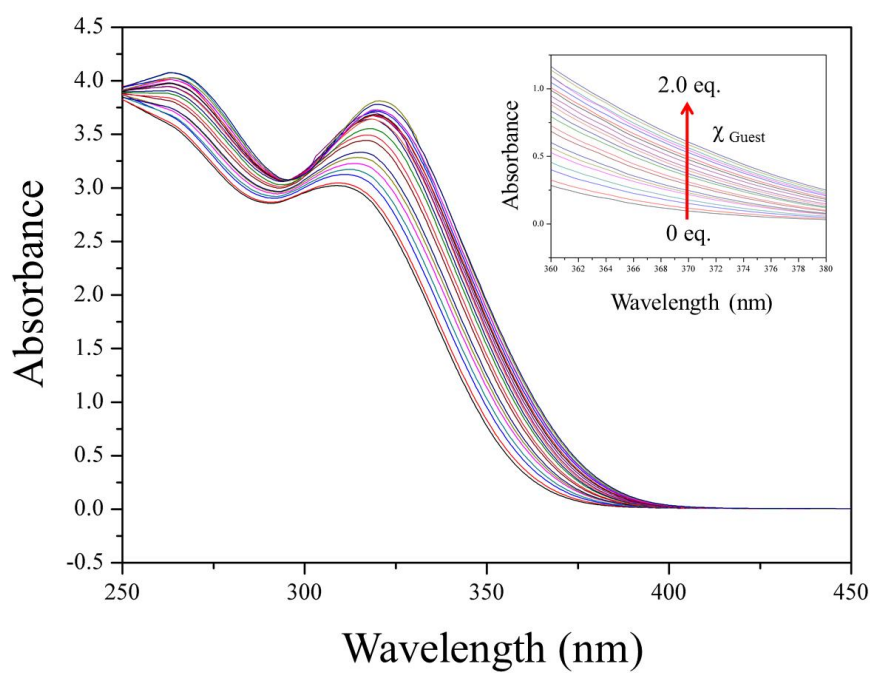

**Figure S30.** Stacked UV-Vis spectra of macrocycle **1a** (50  $\mu\text{M}$ ) titrated by **L1** from 0 eq. to 2.0 eq. in chloroform at 298 K.

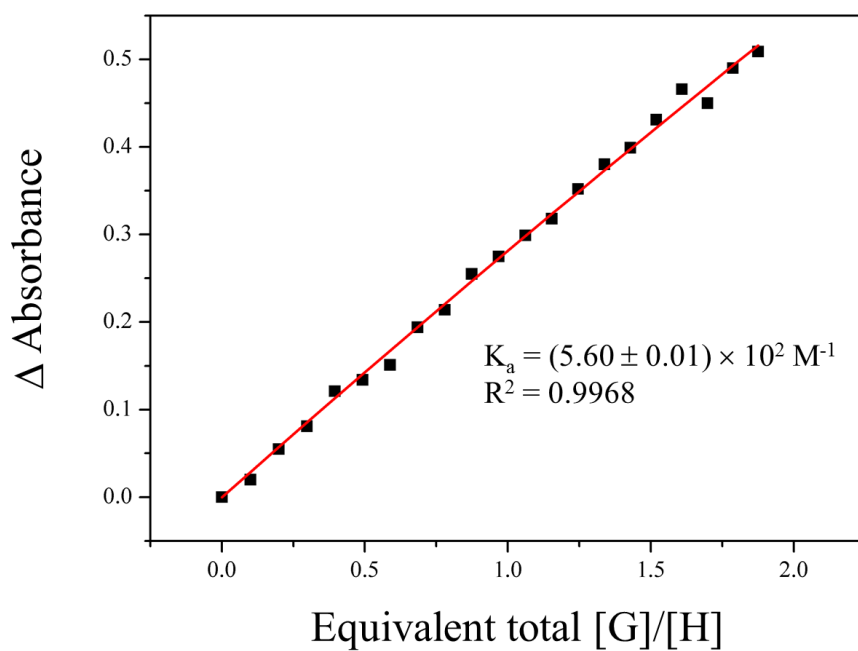

**Figure S31.** Determination of the binding constant of **1a**⊃**L1** in chloroform at 298 K. Fitting result based on absorbance at 370 nm.

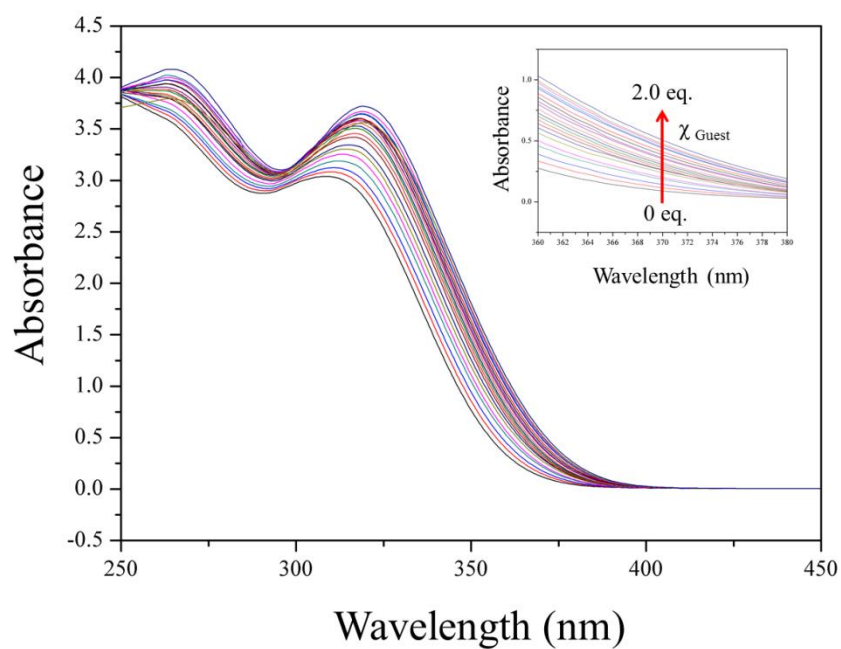

**Figure S32.** Stacked UV-Vis spectra of macrocycle **1a** (50  $\mu\text{M}$ ) titrated by **L2** from 0 eq. to 2.0 eq. in chloroform at 298 K.

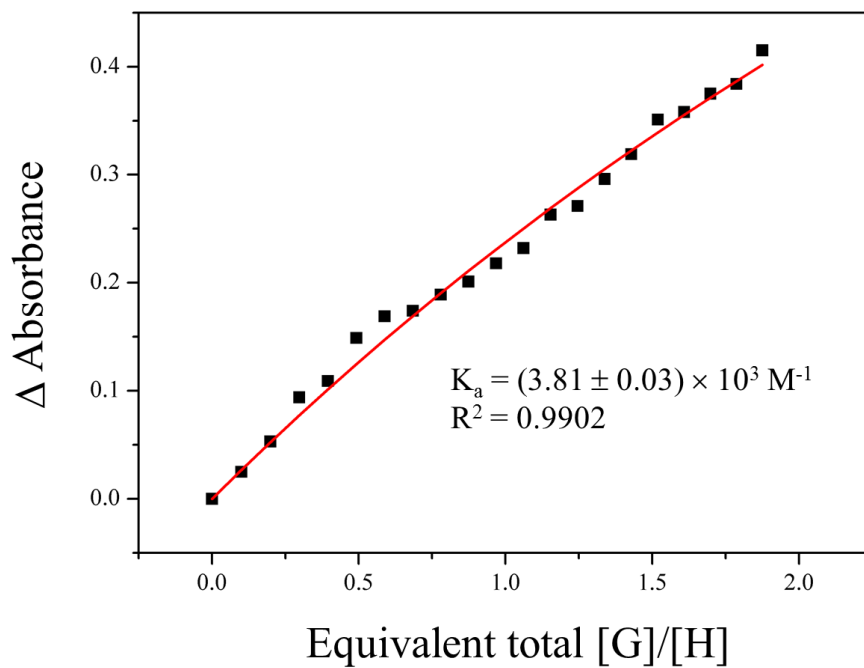

**Figure S33.** Determination of the binding constant of **1a**⊃**L2** in chloroform at 298 K. Fitting result based on absorbance at 370 nm.

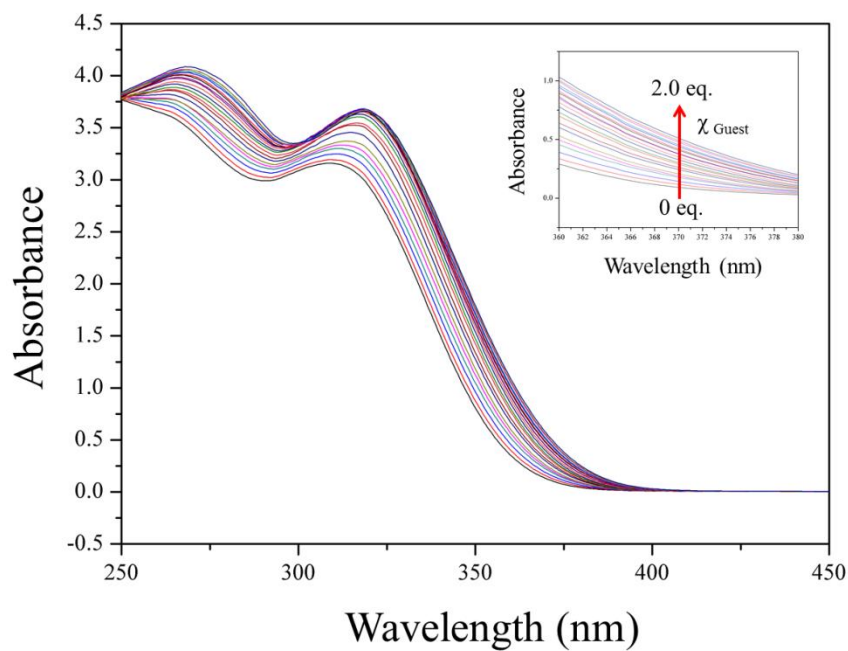

**Figure S34.** Stacked UV-Vis spectra of macrocycle **1a** (50  $\mu\text{M}$ ) titrated by **L3** from 0 eq. to 2.0 eq. in chloroform at 298 K.

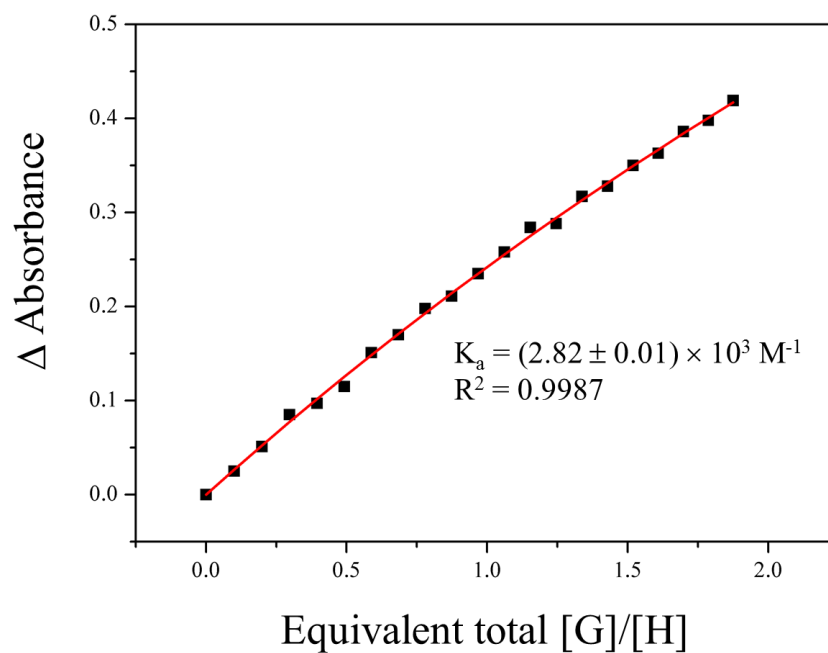

**Figure S35.** Determination of the binding constant of **1a⊃L3** in chloroform at 298 K. Fitting result based on absorbance at 370 nm.

## 10. Symmetrical CD spectral profiles of 1a, 1a⊃L/D-amino acid esters and L/D-amino acid esters

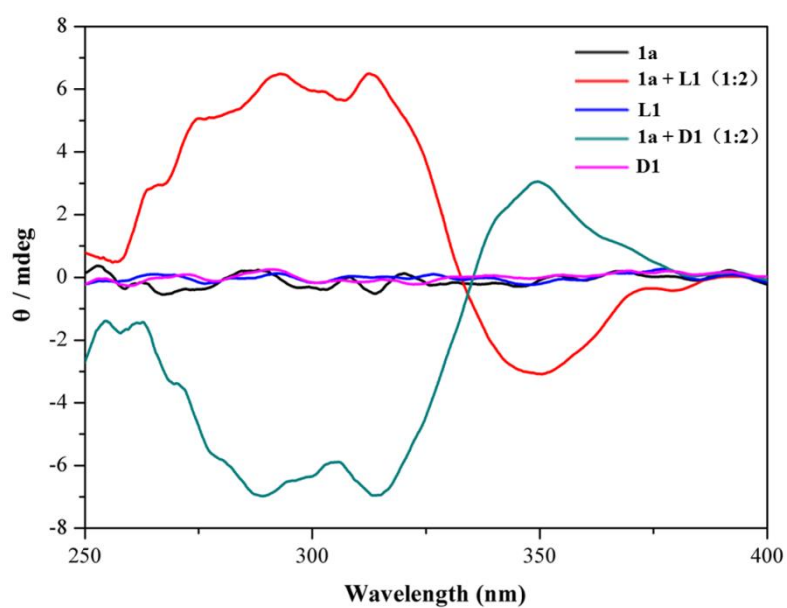

**Figure S36.** CD spectra of **1a** (25  $\mu$ M), **L1** (25  $\mu$ M), **D1** (25  $\mu$ M) and **1a** in the presence of **L1** and **D1** respectively in  $\text{CHCl}_3$  at 298 K (The stoichiometry of host and guest is 1:2. Optical path of cell: 10 mm).

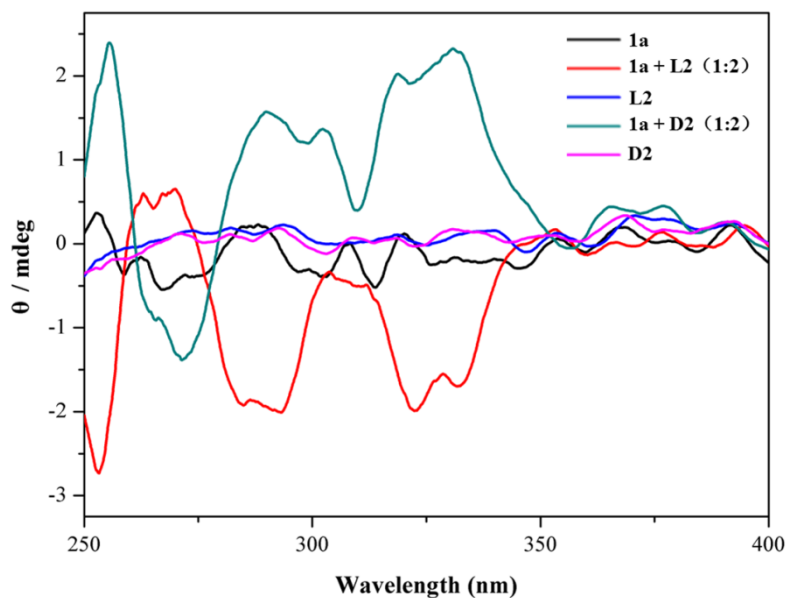

**Figure S37.** CD spectra of **1a** (25  $\mu$ M), **L2** (25  $\mu$ M), **D2** (25  $\mu$ M) and **1a** in the presence of **L2** and **D2** respectively in  $\text{CHCl}_3$  at 298 K (The stoichiometry of host and guest is 1:2. Optical path of cell: 10 mm).

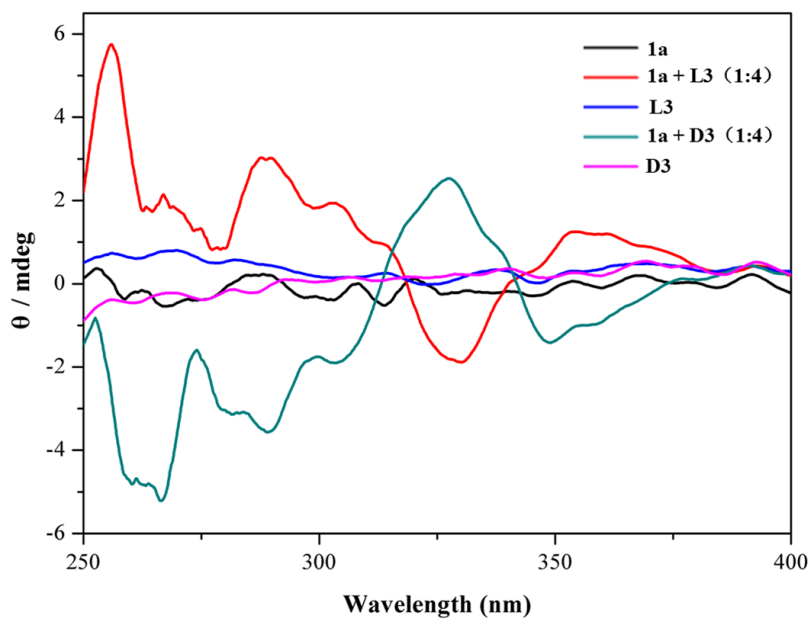

**Figure S38.** CD spectra of **1a** (25  $\mu$ M), **L3** (25  $\mu$ M), **D3** (25  $\mu$ M) and **1a** in the presence of **L3** and **D3** respectively in  $\text{CHCl}_3$  at 298 K (The stoichiometry of host and guest is 1:4. Optical path of cell: 10 mm).

## 11. DFT simulations

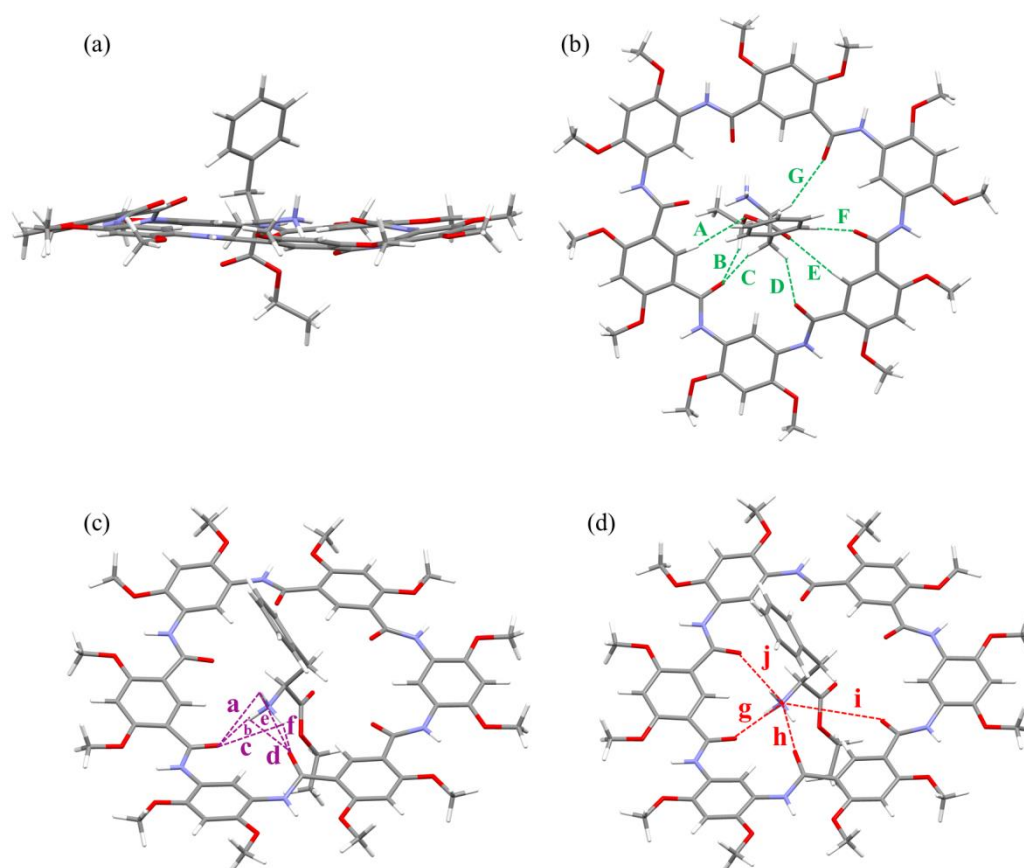

**Figure S39.** Side view (a) and top views (b) / (c) / (d) of optimized geometry of complex **1b-L2** at the B3LYP/6-311G (d, p) level (gray = C, white = H, red = O and blue = N). All side chains are replaced by methyl groups for simplicity and the counterion tetrakis [3,5-bis(trifluoromethyl)phenyl] borate anion ( $\text{BArF}^-$ ) is omitted for clarity. The dashed green lines indicate C-H...O hydrogen bonds A-G and with A = 2.949 Å (150.84°), B = 2.587 Å (131.47°), C = 2.963 Å (135.27°), D = 2.411 Å (144.15°), E = 3.277 Å (122.50°), F = 2.333 Å (173.98°), G = 2.652 Å (154.95°). The dashed purple lines indicate N-H...O hydrogen bonds a-f and with a = 3.056 Å (64.01°), b = 1.814 Å (150.85°), c = 3.026 Å (65.65°), d = 3.060 Å (64.79°), e = 3.053 Å (65.11°), f = 1.827 Å (151.47°). The dashed red lines indicate N<sup>+</sup>...O cation-dipole interactions g-j and with g = 4.033 Å, h = 2.765 Å, i = 2.781 Å and j = 4.628 Å.

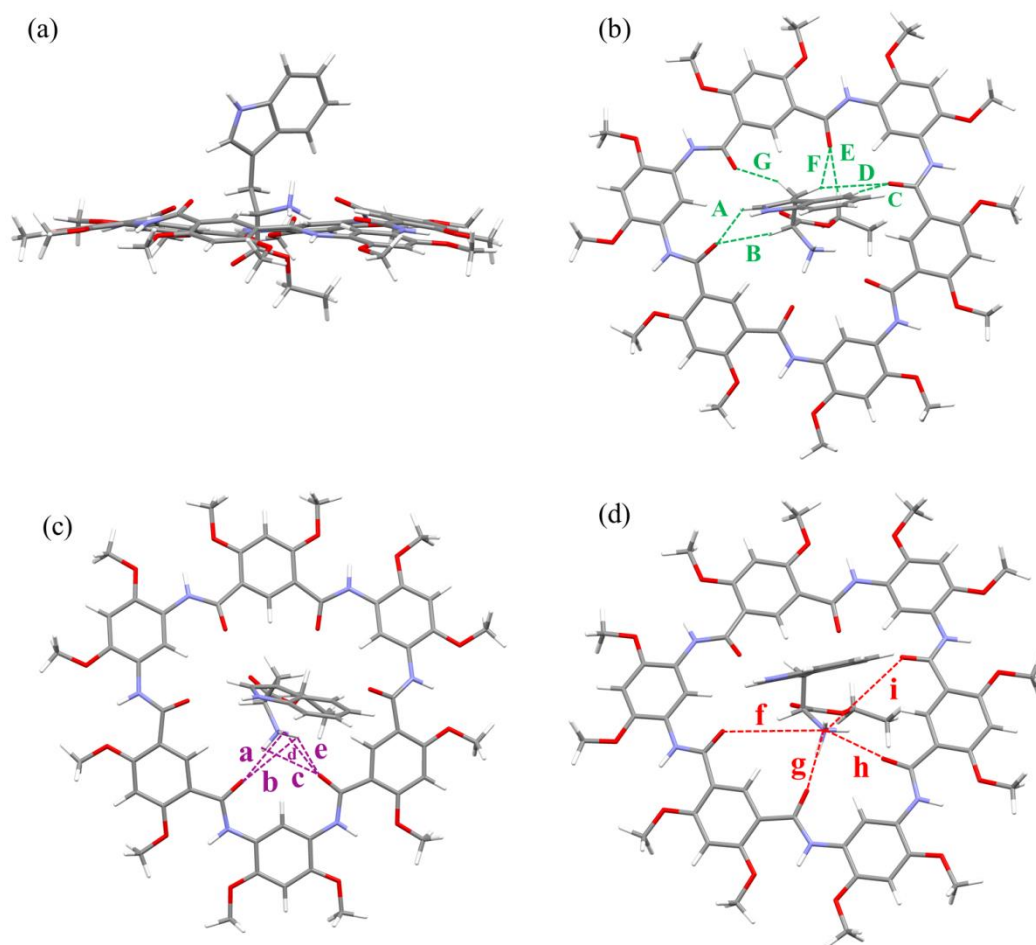

**Figure S40.** Side view (a) and top views (b) / (c) / (d) of optimized geometry of complex **1b-L3** at the B3LYP/6-311G (d, p) level (gray = C, white = H, red = O and blue = N). All side chains are replaced by methyl groups for simplicity and the counterion tetrakis [3,5-bis(trifluoromethyl)phenyl] borate anion (BArF<sup>-</sup>) is omitted for clarity. The dashed green lines indicate C-H $\cdots$ O hydrogen bonds A-G and with A = 2.723 Å (136.37°), B= 2.521 Å (169.89°), C = 2.541 Å (173.77°), D = 3.221 Å (159.00°), E= 2.505 Å (145.68°), F = 3.104 Å (120.84°), G = 2.254 Å (155.43°). The dashed purple lines indicate N-H $\cdots$ O hydrogen bonds a-e and with a = 3.077 Å (61.53°), b = 3.208 Å (54.44°), c = 2.833 Å (77.10°), d = 3.013 Å (67.71°), e = 2.038 Å (127.88°). The dashed red lines indicate N<sup>+</sup> $\cdots$ O cation-dipole interactions f-i and with f = 4.349 Å, g = 2.740 Å, h = 2.791 Å and i = 4.556 Å.
